# Supplementary material for: Insights into the reaction mechanism of CO oxidative coupling to dimethyl oxalate over palladium: a combined DFT and IR study
Source: Royal Society of Chemistry journal article supplement (doi:10.1039/c4cp05738d), 2015-01-01
Supplement: c4cp05738d1.pdf [file c4cp05738d1.pdf]

## Supplementary Material

### Insights into reaction mechanism of CO oxidative coupling to dimethyl oxalate over palladium: A combined DFT and IR study

Qiaohong Li<sup>a</sup>, Zhangfeng Zhou<sup>a,b</sup>, Ruiping Chen<sup>a</sup>, Baozhen Sun<sup>a,c</sup>, Luyang Qiao<sup>a,b</sup>,  
Yuangen Yao<sup>\*a,b</sup>, Kechen Wu<sup>\*\*a</sup>

<sup>a</sup>*State Key Laboratory of Structural Chemistry, Key Laboratory of Coal to Ethylene Fujian Institute of Research on the Structure of Matter, Chinese Academy of Sciences, Fuzhou 350002, PR China*

<sup>b</sup>*Glycol and Its Related Technology, Fujian Institute of Research on the Structure of Matter, Chinese Academy of Sciences, Fuzhou 350002, PR China*

<sup>c</sup>*School of Chemistry and Chemical Engineering, Guangxi University, Nanning 530004, PR China*

effectively enhance the yield of DMO. The microscopic elucidation of this important reaction suggests the following improvements in the coal-to-EG (CTEG) production which have been applied in practice, effectively enhancing the yield and reducing the cost. The results may help with the further fine-designing of high-efficient noble metal catalysts.

---

\* Corresponding author. Fax: +86 591 83714946.  
E-mail address: yyg@fjirsm.ac.cn (Y. Yao).

\*\* Corresponding author. Fax: +86 591 83792932.  
E-mail address: wkc@fjirsm.ac.cn (K. Wu).

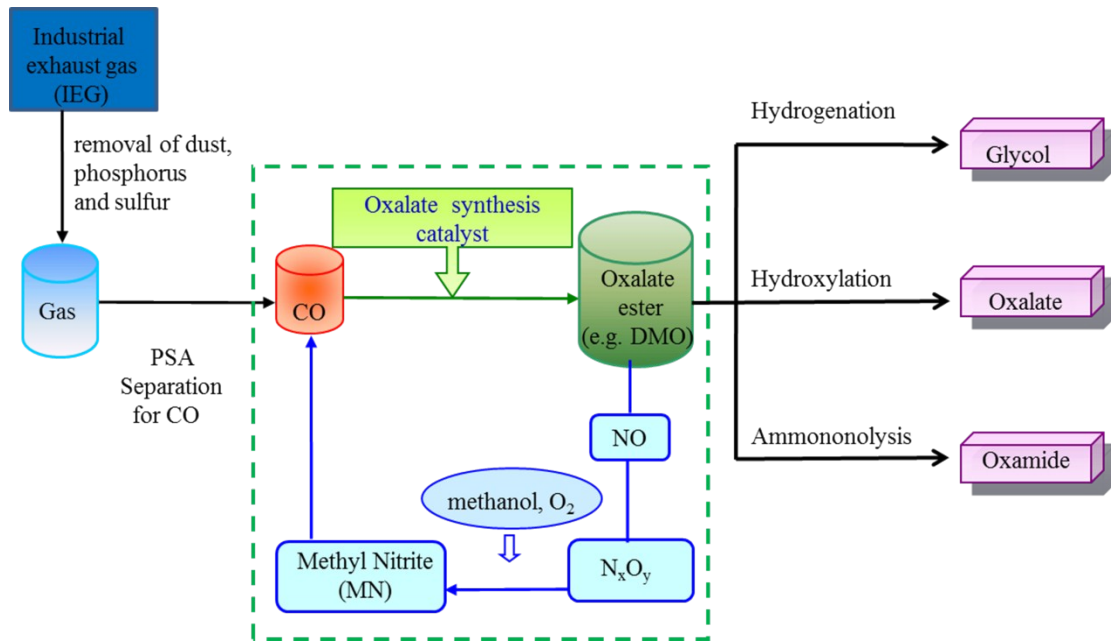

Schema 1S. Diagram of industrial exhaust gas to DMO technology

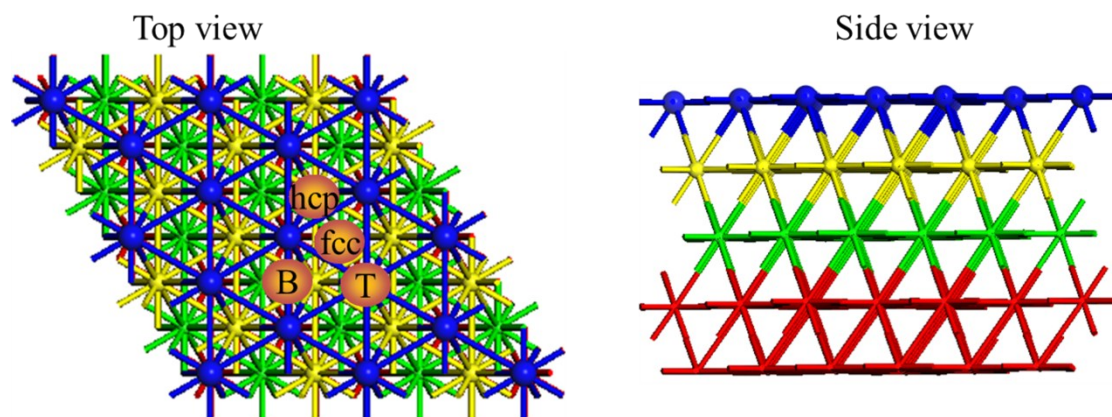

Fig. 1S. Top and side views of the perfect Pd(111) surface used for our calculations. Four adsorptions modes [the  $T(top)$ ,  $B(bridge)$ ,  $hcp$ , and  $fcc$  modes ] on the Pd(111) surface.

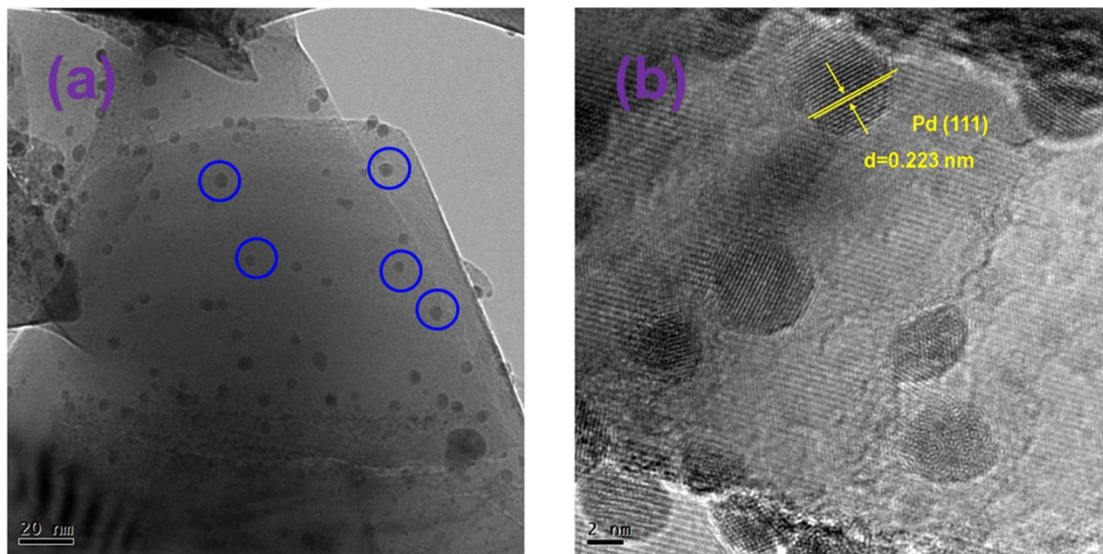

**Fig. 2S.** TEM (a) and HRTEM (b) images fresh of Pd/ $\alpha$ -Al<sub>2</sub>O<sub>3</sub> catalysts after H<sub>2</sub> reduction.

The transmission electron microscope (TEM) image presented in Fig. 2S(a) reveals that the Pd nanoparticles (NPs) of catalyst is highly dispersed on the  $\alpha$ -Al<sub>2</sub>O<sub>3</sub> support with a size of 2-5nm. The high resolution TEM (HRTEM) image of catalyst in Fig. 2(b) shows that the interval between two lattice fringes of Pd NPs is about 0.223 nm, corresponding to the interplanar distance of the (111) plane of the *fcc* Pd[1, 2].

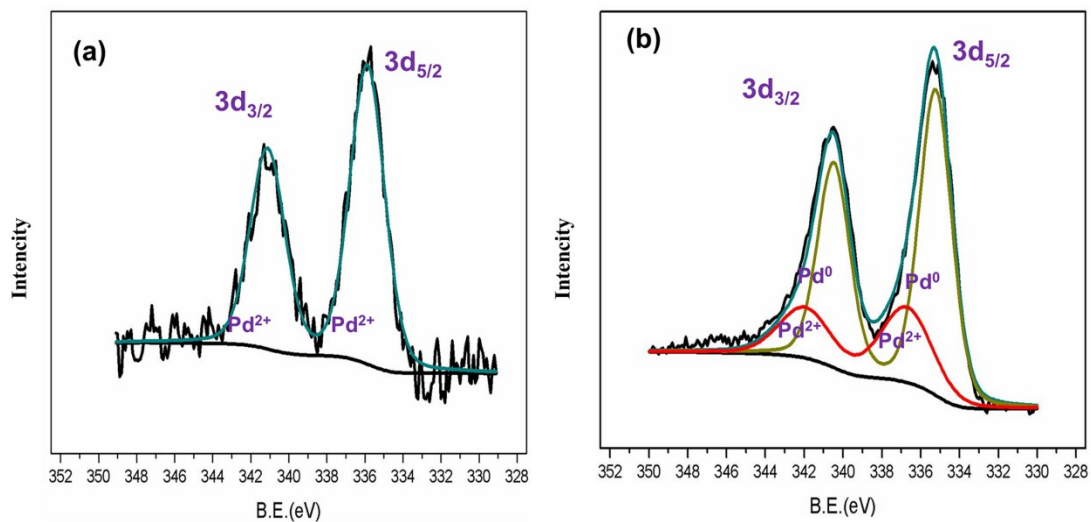

**Fig. 3S.** Curvefit of Pd 3d for XPS profiles of Pd/ $\alpha$ - $Al_2O_3$  catalyst (a) fresh catalyst and (b) catalyst after  $H_2$  reduction.

The Pd-peaks at 337 and 342 eV are assigned to  $Pd^{2+}$ , and these at 335 and 340 eV are assigned to  $Pd^0$  [3], respectively. Thus the Pd on the surface of the fresh catalyst is in  $Pd^{2+}$  state, whereas it on the catalyst after  $H_2$  reducing was mainly in  $Pd^0$  state.

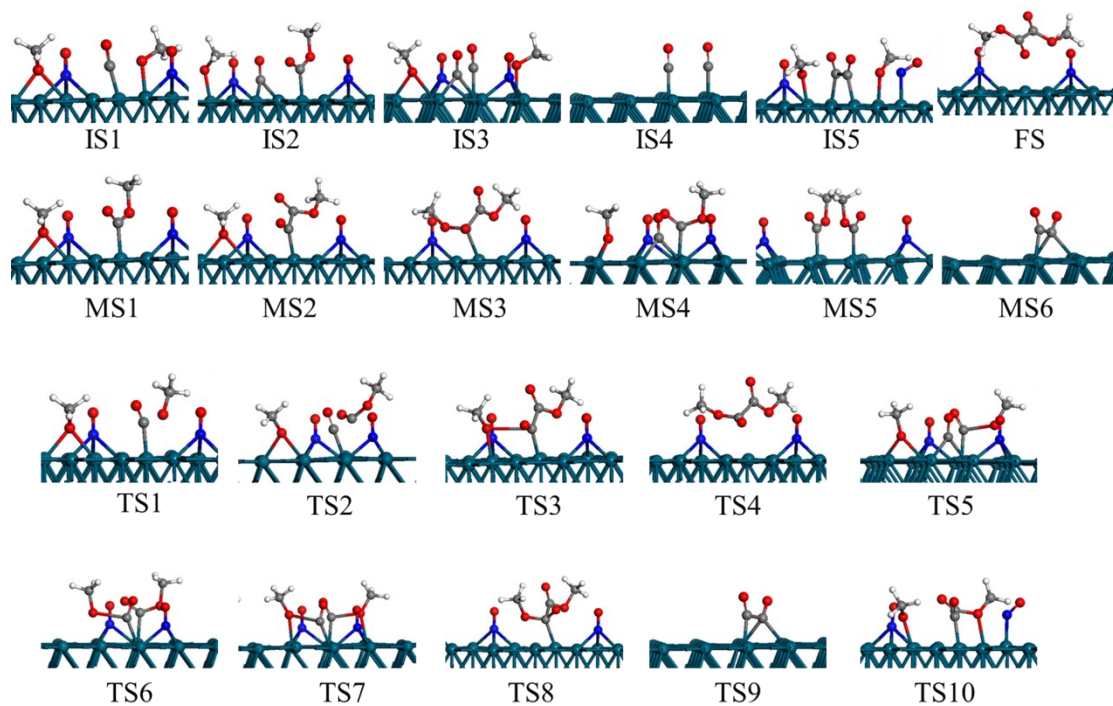

Fig.4S all the initial states (IS1-IS5), intermediate states (MS1-MS6), transition states (TS1-TS10) in three energy profiles for the reaction of CO and MN.

## References

- [1] Z.Q. Niu, Y.-R. Zhen, M. Gong, Q. Peng, P. Nordlander, Y.D. Li, *Chem. Sci.* 2 (2011) 2392-2395.
- [2] B. Lim, M.J. Jiang, J. Tao, P.H.C. Camargo, Y. Zhu, Y.N. Xia, *Adv. Funct. Mater.* 19 (2009) 189-200.
- [3] J.F. Moulder, W.F. Stickle, P.E. Sobol, K.D. Bomben, *Handbook of X-ray Photoelectron Spectroscopy*, Perkin-Elmer Corp, USA, 1992.
